# Supplementary material
Source: PubMed Central journal article supplement (PMC7583660)
Supplement: NIHMS1633559-supplement-Supplementary_Table_1_correct.pdf [file NIHMS1633559-supplement-Supplementary_Table_1_correct.pdf]

**Supplementary Table 1: Irradiation Procedures**

| Institution | n NSL | n SWI+ | Irradiation |          |                    |                 | Geometry        |                  | Sedation              | Supportive Care                                                                                                                |
|-------------|-------|--------|-------------|----------|--------------------|-----------------|-----------------|------------------|-----------------------|--------------------------------------------------------------------------------------------------------------------------------|
|             |       |        | Radiator    | Energy   | Dose Rate (Gy/min) | Dose Range (Gy) | Animal Position | Beam Orientation |                       |                                                                                                                                |
| AFRRI       | 63    | 8      | Co-60       | 1.25 MeV | 0.6                | 1.1 - 8.5       | Seated          | LR-RL            | Ketamine              | Antibiotics, anti-diarrheal medications, anti-emetics, supplemental hydration, supplemental nutrition, whole blood transfusion |
| Citox Labs  | 6     | 2      | Co-60       | 1.25 MeV | 0.6                | 4               | Standing        | AP-PA            | Awake                 | Anti-emetics                                                                                                                   |
| LRRI        | 19    | 0      | LINAC       | 6 MV     | 0.67               | 6.6 - 6.8       | Supine          | LR-RL            | Ketamine & Isoflurane | Antibiotics                                                                                                                    |
| UMD         | 2     | 4      | LINAC       | 6 MV     | 0.8                | 7.5 - 8.5       | Supine          | PA-AP            | Awake                 | Analgesics, anti-diarrheal medications, gastroprotectants, supplemental hydration, supplemental nutrition                      |
| UIC         | 12    | 2      | LINAC       | 6 MV     | 0.8                | 6.75 - 8.05     | Supine          | AP-PA            | Ketamine              | Antibiotics, whole blood transfusion, supplemental hydration, supplemental nutrition                                           |
| WFSM        | 2     | 0      | LINAC       | 6 MV     | 0.8                | 6               | Supine          | LR-RL            | Ketamine & Isoflurane | Analgesics, antibiotics, supplemental hydration, supplemental nutrition                                                        |
| Total       | 104   | 16     |             |          |                    |                 |                 |                  |                       |                                                                                                                                |

NSL: No significant lesions; SWI: Susceptibility weighted imaging (brain lesion); Gy: Gray; AFRRI: Armed Forces Radiobiology Research Institute; LR: Left-right; RL: Right-left; AP: Anterior-posterior; PA: Posterior-anterior; LRRI: Lovelace Respiratory Research Institute; UMD: University of Maryland; UIC: University of Illinois at Chicago; WFSM: Wake Forest School of Medicine
